# Supplementary material
Source: PubMed Central journal article supplement (PMC3668770)

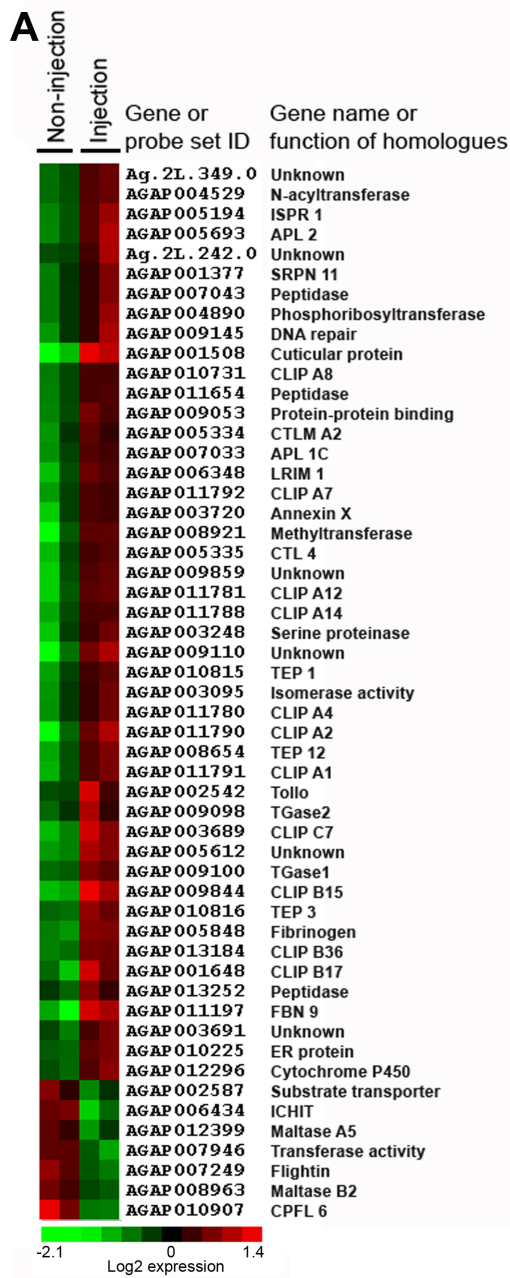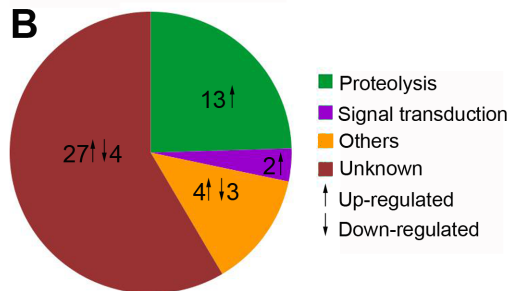

Supplement: supp_M112.443267_jbc.M112.443267-1.pdf [file supp_M112.443267_jbc.M112.443267-1.pdf]

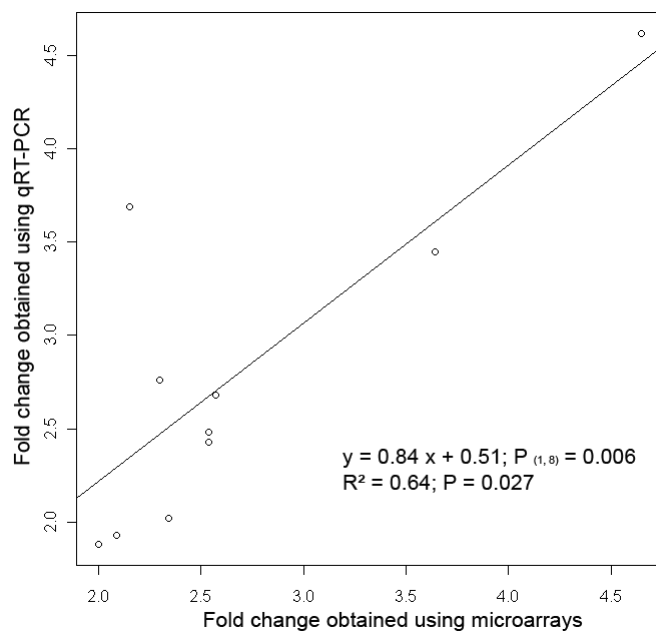

Supplement: supp_M112.443267_jbc.M112.443267-2.pdf [file supp_M112.443267_jbc.M112.443267-2.pdf]

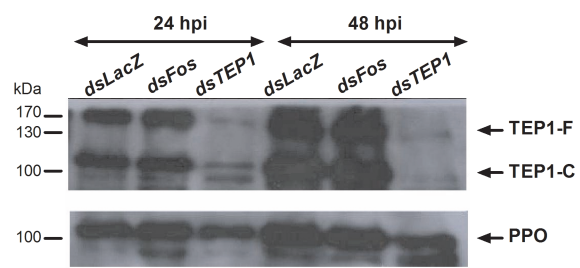

Supplement: supp_M112.443267_jbc.M112.443267-3.pdf [file supp_M112.443267_jbc.M112.443267-3.pdf]
